# Supplementary material
Source: HighWire-hosted journal article supplement (https://bmjopen.bmj.com/content/8/12/bmjopen-2018-022292)
Supplement: inline-supplementary-material-1 [file inline-supplementary-material-1.pdf]

### Appendix 1. World Health Organization Trial Registration Data Set.

| DATA CATEGORY                                 | INFORMATION                                                                                                                                                                                                                                                                                                                                                                                                                                                                                               |
|-----------------------------------------------|-----------------------------------------------------------------------------------------------------------------------------------------------------------------------------------------------------------------------------------------------------------------------------------------------------------------------------------------------------------------------------------------------------------------------------------------------------------------------------------------------------------|
| Primary registry and trial identifying number | Registry: ISRCTN. Identifying number: ISRCTN16493616.                                                                                                                                                                                                                                                                                                                                                                                                                                                     |
| Date of registration in primary registry      | 9 October, 2017                                                                                                                                                                                                                                                                                                                                                                                                                                                                                           |
| Secondary identifying numbers                 | Protocol/serial number: PREVENT-PTSD/Protocol V1.                                                                                                                                                                                                                                                                                                                                                                                                                                                         |
| Source(s) of monetary or material support     | MQ: Transforming Mental Health                                                                                                                                                                                                                                                                                                                                                                                                                                                                            |
| Primary sponsor                               | MQ: Transforming Mental Health                                                                                                                                                                                                                                                                                                                                                                                                                                                                            |
| Secondary sponsor(s)                          | University of Oxford                                                                                                                                                                                                                                                                                                                                                                                                                                                                                      |
| Contact for public queries                    | JW +44(0)1865 618612, jennifer.wild@psy.ox.ac.uk                                                                                                                                                                                                                                                                                                                                                                                                                                                          |
| Contact for scientific queries                | JW +44(0)1865 618612, jennifer.wild@psy.ox.ac.uk                                                                                                                                                                                                                                                                                                                                                                                                                                                          |
| Public title                                  | PREVENT-PTSD                                                                                                                                                                                                                                                                                                                                                                                                                                                                                              |
| Scientific title                              | Preventing PTSD, depression, and associated health problems in student paramedics: Protocol for PREVENT-PTSD, a randomised controlled trial of supported online cognitive training for resilience versus alternative online training and standard practice                                                                                                                                                                                                                                                |
| Countries of recruitment                      | England                                                                                                                                                                                                                                                                                                                                                                                                                                                                                                   |
| Health condition(s) or problem(s) studied     | Post-traumatic stress disorder (PTSD), major depression (MD), resilience, adverse health behaviours (sleep problems, weight gain and smoking), hormone and immune function, utilization of health services and productivity loss.                                                                                                                                                                                                                                                                         |
| Intervention(s)                               | Active comparator: Resilience intervention focusing on modifying rumination and cognitive appraisals<br>Control comparator: Online information and advice about stress, sleep problems, anger, depression PTSD and mindfulness<br>Standard practice comparator: Training as usual                                                                                                                                                                                                                         |
| Key inclusion and exclusion criteria          | Ages eligible for study: ≥18 years<br>Sexes eligible for study: both<br>Accepts healthy volunteers: yes<br>Inclusion criteria: student paramedics (≥ 18 years) who do not currently have depression or PTSD needing treatment and who are not actively suicidal.<br>Exclusion criteria: student paramedics who meet criteria for depression or PTSD and whose lives are significantly impacted by their symptoms, thereby needing treatment; student paramedics who express suicidal ideation and intent. |
| Study type                                    | Interventional<br>Allocation: randomised<br>Intervention model: parallel assignment<br>Masking: assessors blinded to all assessments<br>Primary purpose: prevention<br>Phase I                                                                                                                                                                                                                                                                                                                            |
| Date of first enrolment                       | October 2017                                                                                                                                                                                                                                                                                                                                                                                                                                                                                              |
| Target sample size                            | 570                                                                                                                                                                                                                                                                                                                                                                                                                                                                                                       |

|                        |                                                                                                                                                                                                                                                                                                                                                                                                                         |
|------------------------|-------------------------------------------------------------------------------------------------------------------------------------------------------------------------------------------------------------------------------------------------------------------------------------------------------------------------------------------------------------------------------------------------------------------------|
| Recruitment status     | Recruiting                                                                                                                                                                                                                                                                                                                                                                                                              |
| Primary outcome(s)     | Diagnoses of PTSD and MD assessed by an independent assessor using the Structured Clinical Interview for DSM-5                                                                                                                                                                                                                                                                                                          |
| Key secondary outcomes | <p>Mental Health: resilience, rumination, symptoms of anxiety, and sleep problems, psychological distress, wellbeing</p> <p>Immune and Endocrine Function: cortisol awakening response and plasma levels of C-reactive protein</p> <p>Physical health behaviours: smoking, weight gain, alcohol use.</p> <p>Health Economics: utilisation of health services, episodes of PTSD and MD, absenteeism and presenteeism</p> |
